# Supplementary material for: Two-stage penalized regression screening to detect biomarker-treatment interactions in randomized clinical trials
Source: PubMed Central journal article supplement (PMC7613856; doi:10.1111/biom.13424), 2021-01-29
Supplement: EMS157113-supplement-Appendix.pdf [file EMS157113-supplement-Appendix.pdf]

### **SUPPORTING INFORMATION**

Web Appendices referenced in Sections 2 and 3, and the R code for simulation studies and data applications are available with this paper at the Biometrics website on Wiley Online Library.

**How to cite this article:** Wang J, Patel A, Wason JMS, Newcombe PJ. Two-stage penalized regression screening to detect biomarker–treatment interactions in randomized clinical trials.

*Biometrics*. 2022;78:141–150.

<https://doi.org/10.1111/biom.13424>

## APPENDIX A

### A.1 | Proof of Theorem 1

Based on the unified approach to proving between-stage asymptotic independence by Dai *et al.* (2012), we need to evaluate the covariance matrix  $\mathbf{A}_1^{-1}\mathbf{B}\mathbf{A}_2^{-1}$ , where

$$\mathbf{A}_1 = E[(\mathbf{X}_i\mathbf{X}_i^T)\{Y_i - E(Y_i | \mathbf{X}_i)\}^2]$$

$$\mathbf{B} = E[(\mathbf{X}_i\mathbf{V}_{ij}^T)\{Y_i - E(Y_i | \mathbf{X}_i)\}\{Y_i - E(Y_i | \mathbf{V}_{ij})\}]$$

$$\mathbf{A}_2 = E[(\mathbf{V}_{ij}\mathbf{V}_{ij}^T)\{Y_i - E(Y_i | \mathbf{V}_{ij})\}^2].$$

We simplify the expression of  $\mathbf{B}$  as

$$\begin{aligned} \mathbf{B} &= E[(\mathbf{X}_i\mathbf{V}_{ij}^T)\{Y_i^2 - Y_iE(Y_i | \mathbf{X}_i) - Y_iE(Y_i | \mathbf{V}_{ij}) \\ &\quad + E(Y_i | \mathbf{X}_i)E(Y_i | \mathbf{V}_{ij})\}] \\ &= E[(\mathbf{X}_i\mathbf{V}_{ij}^T)E\{Y_i^2 - Y_iE(Y_i | \mathbf{X}_i) - Y_iE(Y_i | \mathbf{V}_{ij}) \\ &\quad + E(Y_i | \mathbf{X}_i)E(Y_i | \mathbf{V}_{ij}) | \mathbf{X}_i\}] \\ &= E(\mathbf{X}_i\mathbf{V}_{ij}^T)\text{var}(Y_i | \mathbf{X}_i) \end{aligned}$$

which uses the law of iterated expectations, the fact that  $\mathbf{X}_i$  includes  $\mathbf{V}_{ij}$  under the null hypothesis  $\beta_{X_j \times T} = 0$ , and assumes homogeneity of variance, that is  $\text{var}(Y_i | \mathbf{X}_i)$  is a constant.

Similarly, we have  $\mathbf{A}_1 = E(\mathbf{X}_i\mathbf{X}_i^T)\text{var}(Y_i | \mathbf{X}_i)$  and  $\mathbf{A}_2 = E(\mathbf{V}_{ij}\mathbf{V}_{ij}^T)\text{var}(Y_i | \mathbf{V}_{ij})$ . Thus,

$$\mathbf{A}_1^{-1}\mathbf{B}\mathbf{A}_2^{-1} \propto E(\mathbf{X}_i\mathbf{X}_i^T)^{-1}E(\mathbf{X}_i\mathbf{V}_{ij}^T)E(\mathbf{V}_{ij}\mathbf{V}_{ij}^T)^{-1}.$$

We consider the second and the third terms:

$$E(\mathbf{X}_i\mathbf{V}_{ij}^T)_{(m+1) \times 3} = \begin{Bmatrix} E(T_i X_{ij}) & E(T_i^2) & E(T_i^2 X_{ij}) \\ E(X_{i1} X_{ij}) & E(T_i X_{i1}) & E(T_i X_{i1} X_{ij}) \\ \vdots & \vdots & \vdots \\ E(X_{im} X_{ij}) & E(T_i X_{im}) & E(T_i X_{im} X_{ij}) \end{Bmatrix}$$

$$E(\mathbf{V}_{ij}\mathbf{V}_{ij}^T)_{3 \times 3}^{-1} = \frac{1}{\det\{E(\mathbf{V}_{ij}\mathbf{V}_{ij}^T)\}}$$

$$\times \begin{Bmatrix} \cdot & \cdot & E(T_i X_{ij})E(T_i^2 X_{ij}) - E(T_i^2)E(T_i X_{ij}^2) \\ \cdot & \cdot & E(T_i X_{ij})E(T_i X_{ij}^2) - E(X_{ij}^2)E(T_i^2 X_{ij}) \\ \cdot & \cdot & E(X_{ij}^2)E(T_i^2) - E(T_i X_{ij})^2 \end{Bmatrix}.$$

Thus, for the  $(m+1) \times 3$  matrix  $E(\mathbf{X}_i\mathbf{V}_{ij}^T)E(\mathbf{V}_{ij}\mathbf{V}_{ij}^T)^{-1}$ , the  $(k+1)$ th element ( $k = 1, \dots, m$ ) of the last column is proportional to

$$\begin{aligned} &\{E(X_{ik} X_{ij}), E(T_i X_{ik}), E(T_i X_{ik} X_{ij})\} \\ &\times \begin{Bmatrix} E(T_i X_{ij})E(T_i^2 X_{ij}) - E(T_i^2)E(T_i X_{ij}^2) \\ E(T_i X_{ij})E(T_i X_{ij}^2) - E(X_{ij}^2)E(T_i^2 X_{ij}) \\ E(X_{ij}^2)E(T_i^2) - E(T_i X_{ij})^2 \end{Bmatrix} \\ &= E(T_i)\text{var}(T_i)E(X_{ij}) \\ &\quad \times \{E(X_{ik} X_{ij})E(X_{ij}) - E(X_{ik})E(X_{ij}^2)\} = 0, \end{aligned}$$

which uses the independence between  $T_i$  and  $X_{ij}$  and the assumption  $E(T_i) = 0$  or  $E(X_{ij}) = 0$ . Similarly, the first element of the last column is also zero.

Premultiplying  $E(\mathbf{X}_i\mathbf{V}_{ij}^T)E(\mathbf{V}_{ij}\mathbf{V}_{ij}^T)^{-1}$  by  $E(\mathbf{X}_i\mathbf{X}_i^T)^{-1}$  completes the covariance matrix, the last column of which are all zeros. Thus, for any  $j = 1, \dots, m$ , we have  $\text{cov}\{n^{1/2}(\hat{\delta}_{X_j}^0 - \delta_{X_j}), n^{1/2}(\hat{\beta}_{X_j \times T} - \beta_{X_j \times T})\} \rightarrow 0$  in probability.
